# Supplementary material for: Comparative transcriptome analysis reveals key pathways and genes involved in trichome development in tea plant (Camellia sinensis)
Source: Frontiers journal article supplement (doi:10.3389/fpls.2022.997778), 2022-09-23
Supplement: Table_6.XLS [file Table_6.XLS]

## Sheet: Table S6 A
Supplementary Table S6 A. Significant enriched GO terms of CYQ1 vs CYQ2, CYQ2 vs CYQ3, and CYQ1 vs CYQ3 pairwise comparisons.
comparisons	Category	GO ID	Description
CYQ1 vs CYQ2	BP	GO:0015979	photosynthesis
	BP	GO:0008610	lipid biosynthetic process
	BP	GO:0006633	fatty acid biosynthetic process
	BP	GO:1901136	carbohydrate derivative catabolic process
	BP	GO:0006631	fatty acid metabolic process
	BP	GO:0006022	aminoglycan metabolic process
	BP	GO:0006026	aminoglycan catabolic process
	BP	GO:0006030	chitin metabolic process
	BP	GO:0006032	chitin catabolic process
	BP	GO:0006040	amino sugar metabolic process
	BP	GO:0016998	cell wall macromolecule catabolic process
	BP	GO:0044036	cell wall macromolecule metabolic process
	BP	GO:0046348	amino sugar catabolic process
	BP	GO:1901071	glucosamine-containing compound metabolic process
	BP	GO:1901072	glucosamine-containing compound catabolic process
	BP	GO:0044255	cellular lipid metabolic process
	BP	GO:0009116	nucleoside metabolic process
	BP	GO:1901657	glycosyl compound metabolic process
	BP	GO:0044711	single-organism biosynthetic process
	CC	GO:0009579	thylakoid
	CC	GO:0044436	thylakoid part
	CC	GO:0034357	photosynthetic membrane
	CC	GO:0009521	photosystem
	CC	GO:0009523	photosystem II
	CC	GO:0009522	photosystem I
	CC	GO:0042651	thylakoid membrane
	CC	GO:0009654	photosystem II oxygen evolving complex
	CC	GO:0019898	extrinsic component of membrane
	CC	GO:1990204	oxidoreductase complex
	CC	GO:0098796	membrane protein complex
	MF	GO:0004144	diacylglycerol O-acyltransferase activity
	MF	GO:0016411	acylglycerol O-acyltransferase activity
	MF	GO:0001071	nucleic acid binding transcription factor activity
	MF	GO:0016747	transferase activity, transferring acyl groups other than amino-acyl groups
	MF	GO:0016746	transferase activity, transferring acyl groups
	MF	GO:0016705	oxidoreductase activity, acting on paired donors, with incorporation or reduction of molecular oxygen
	MF	GO:0008374	O-acyltransferase activity
	MF	GO:0005506	iron ion binding
	MF	GO:0004568	chitinase activity
	MF	GO:0008061	chitin binding
	MF	GO:0050660	flavin adenine dinucleotide binding
	MF	GO:0070008	serine-type exopeptidase activity
	MF	GO:0022804	active transmembrane transporter activity
	MF	GO:0008238	exopeptidase activity
	MF	GO:0015238	drug transmembrane transporter activity
	MF	GO:0004185	serine-type carboxypeptidase activity
	MF	GO:0050662	coenzyme binding
	MF	GO:0004180	carboxypeptidase activity
	MF	GO:0016798	hydrolase activity, acting on glycosyl bonds
	MF	GO:0008236	serine-type peptidase activity
	MF	GO:0017171	serine hydrolase activity
	MF	GO:0015297	antiporter activity
	MF	GO:0016157	sucrose synthase activity
	MF	GO:0090484	drug transporter activity
	MF	GO:0035251	UDP-glucosyltransferase activity
	MF	GO:0004553	hydrolase activity, hydrolyzing O-glycosyl compounds
	MF	GO:0033926	glycopeptide alpha-N-acetylgalactosaminidase activity
	MF	GO:0015291	secondary active transmembrane transporter activity
	MF	GO:0016846	carbon-sulfur lyase activity
CYQ2 vs CYQ3	BP	GO:0006928	movement of cell or subcellular component
	BP	GO:0007018	microtubule-based movement
	BP	GO:0007017	microtubule-based process
	BP	GO:0015979	photosynthesis
	CC	GO:0009579	thylakoid
	CC	GO:0044436	thylakoid part
	CC	GO:0034357	photosynthetic membrane
	CC	GO:0042651	thylakoid membrane
	CC	GO:0009521	photosystem
	CC	GO:0009654	photosystem II oxygen evolving complex
	CC	GO:0019898	extrinsic component of membrane
	CC	GO:0009523	photosystem II
	CC	GO:0005618	cell wall
	CC	GO:0030312	external encapsulating structure
	CC	GO:0071944	cell periphery
	CC	GO:0048046	apoplast
	MF	GO:0008017	microtubule binding
	MF	GO:0003777	microtubule motor activity
	MF	GO:0008092	cytoskeletal protein binding
	MF	GO:0015631	tubulin binding
	MF	GO:0003774	motor activity
	MF	GO:0005509	calcium ion binding
	MF	GO:0016798	hydrolase activity, acting on glycosyl bonds
	MF	GO:0004553	hydrolase activity, hydrolyzing O-glycosyl compounds
CYQ1 vs CYQ3	BP	GO:0015979	photosynthesis
	BP	GO:0006928	movement of cell or subcellular component
	BP	GO:0007018	microtubule-based movement
	BP	GO:0007017	microtubule-based process
	BP	GO:0030243	cellulose metabolic process
	BP	GO:0030244	cellulose biosynthetic process
	BP	GO:0007049	cell cycle
	BP	GO:0048523	negative regulation of cellular process
	BP	GO:0017148	negative regulation of translation
	BP	GO:0032269	negative regulation of cellular protein metabolic process
	BP	GO:0034249	negative regulation of cellular amide metabolic process
	BP	GO:0051248	negative regulation of protein metabolic process
	BP	GO:0034637	cellular carbohydrate biosynthetic process
	BP	GO:0000271	polysaccharide biosynthetic process
	BP	GO:0009250	glucan biosynthetic process
	BP	GO:0033692	cellular polysaccharide biosynthetic process
	BP	GO:0051273	beta-glucan metabolic process
	BP	GO:0051274	beta-glucan biosynthetic process
	BP	GO:0042592	homeostatic process
	BP	GO:0022402	cell cycle process
	BP	GO:0065008	regulation of biological quality
	BP	GO:0019725	cellular homeostasis
	BP	GO:0016051	carbohydrate biosynthetic process
	BP	GO:0045454	cell redox homeostasis
	CC	GO:0009579	thylakoid
	CC	GO:0044436	thylakoid part
	CC	GO:0034357	photosynthetic membrane
	CC	GO:0009521	photosystem
	CC	GO:0009523	photosystem II
	CC	GO:0042651	thylakoid membrane
	CC	GO:0009654	photosystem II oxygen evolving complex
	CC	GO:0019898	extrinsic component of membrane
	CC	GO:0009522	photosystem I
	CC	GO:0044427	chromosomal part
	MF	GO:0008017	microtubule binding
	MF	GO:0015631	tubulin binding
	MF	GO:0003777	microtubule motor activity
	MF	GO:0008092	cytoskeletal protein binding
	MF	GO:0016799	hydrolase activity, hydrolyzing N-glycosyl compounds
	MF	GO:0030597	RNA glycosylase activity
	MF	GO:0030598	rRNA N-glycosylase activity
	MF	GO:0008236	serine-type peptidase activity
	MF	GO:0017171	serine hydrolase activity
	MF	GO:0016759	cellulose synthase activity
	MF	GO:0016760	cellulose synthase (UDP-forming) activity
	MF	GO:0004185	serine-type carboxypeptidase activity
	MF	GO:0004180	carboxypeptidase activity
	MF	GO:0070008	serine-type exopeptidase activity
	MF	GO:0008238	exopeptidase activity
	MF	GO:0005509	calcium ion binding
	MF	GO:0003774	motor activity
	MF	GO:0016798	hydrolase activity, acting on glycosyl bonds
	MF	GO:0035251	UDP-glucosyltransferase activity
	MF	GO:0046982	protein heterodimerization activity

## Sheet: Table S6 B
Supplementary Table S6 B. Significant enriched GO terms of BDM1 vs BDM2, BDM2 vs BDM3, and BDM1 vs BDM3 pairwise comparisons.
comparisons	Category	GO ID	Description
BDM1 vs BDM2	BP	GO:0071554	cell wall organization or biogenesis
	BP	GO:1901136	carbohydrate derivative catabolic process
	BP	GO:0006022	aminoglycan metabolic process
	BP	GO:0006026	aminoglycan catabolic process
	BP	GO:0006030	chitin metabolic process
	BP	GO:0006032	chitin catabolic process
	BP	GO:0006040	amino sugar metabolic process
	BP	GO:0016998	cell wall macromolecule catabolic process
	BP	GO:0044036	cell wall macromolecule metabolic process
	BP	GO:0046348	amino sugar catabolic process
	BP	GO:1901071	glucosamine-containing compound metabolic process
	BP	GO:1901072	glucosamine-containing compound catabolic process
	BP	GO:0045229	external encapsulating structure organization
	BP	GO:0071555	cell wall organization
	BP	GO:1901565	organonitrogen compound catabolic process
	BP	GO:0009057	macromolecule catabolic process
	BP	GO:0042545	cell wall modification
	BP	GO:0030243	cellulose metabolic process
	BP	GO:0030244	cellulose biosynthetic process
	BP	GO:1901575	organic substance catabolic process
	BP	GO:0044248	cellular catabolic process
	BP	GO:0000271	polysaccharide biosynthetic process
	BP	GO:0009250	glucan biosynthetic process
	BP	GO:0033692	cellular polysaccharide biosynthetic process
	BP	GO:0051273	beta-glucan metabolic process
	BP	GO:0051274	beta-glucan biosynthetic process
	BP	GO:0006073	cellular glucan metabolic process
	BP	GO:0044042	glucan metabolic process
	BP	GO:0044264	cellular polysaccharide metabolic process
	BP	GO:0009056	catabolic process
	CC	GO:0005618	cell wall
	CC	GO:0030312	external encapsulating structure
	MF	GO:0004568	chitinase activity
	MF	GO:0016798	hydrolase activity, acting on glycosyl bonds
	MF	GO:0004553	hydrolase activity, hydrolyzing O-glycosyl compounds
	MF	GO:0005507	copper ion binding
	MF	GO:0008236	serine-type peptidase activity
	MF	GO:0017171	serine hydrolase activity
	MF	GO:0008061	chitin binding
	MF	GO:0030599	pectinesterase activity
	MF	GO:0004252	serine-type endopeptidase activity
	MF	GO:0046983	protein dimerization activity
	MF	GO:0050660	flavin adenine dinucleotide binding
	MF	GO:0016747	transferase activity, transferring acyl groups other than amino-acyl groups
	MF	GO:0004857	enzyme inhibitor activity
	MF	GO:0016788	hydrolase activity, acting on ester bonds
	MF	GO:0016746	transferase activity, transferring acyl groups
	MF	GO:0008194	UDP-glycosyltransferase activity
	MF	GO:0016759	cellulose synthase activity
	MF	GO:0016760	cellulose synthase (UDP-forming) activity
	MF	GO:0052689	carboxylic ester hydrolase activity
	MF	GO:0004175	endopeptidase activity
	MF	GO:0045735	nutrient reservoir activity
	MF	GO:0004144	diacylglycerol O-acyltransferase activity
	MF	GO:0016411	acylglycerol O-acyltransferase activity
BDM2 vs BDM3	BP	GO:0015979	photosynthesis
	BP	GO:0006928	movement of cell or subcellular component
	BP	GO:0007018	microtubule-based movement
	BP	GO:0006323	DNA packaging
	BP	GO:0007017	microtubule-based process
	BP	GO:0006334	nucleosome assembly
	BP	GO:0031497	chromatin assembly
	BP	GO:0034728	nucleosome organization
	BP	GO:0065004	protein-DNA complex assembly
	BP	GO:0071824	protein-DNA complex subunit organization
	BP	GO:0006073	cellular glucan metabolic process
	BP	GO:0044042	glucan metabolic process
	BP	GO:0044264	cellular polysaccharide metabolic process
	BP	GO:0006333	chromatin assembly or disassembly
	BP	GO:0030243	cellulose metabolic process
	BP	GO:0030244	cellulose biosynthetic process
	CC	GO:0042651	thylakoid membrane
	CC	GO:0009579	thylakoid
	CC	GO:0044436	thylakoid part
	CC	GO:0009654	photosystem II oxygen evolving complex
	CC	GO:0034357	photosynthetic membrane
	CC	GO:0019898	extrinsic component of membrane
	CC	GO:0009521	photosystem
	CC	GO:1990204	oxidoreductase complex
	CC	GO:0009523	photosystem II
	CC	GO:0044815	DNA packaging complex
	CC	GO:0000786	nucleosome
	CC	GO:0032993	protein-DNA complex
	CC	GO:0000785	chromatin
	CC	GO:0044427	chromosomal part
	CC	GO:0005694	chromosome
	MF	GO:0046982	protein heterodimerization activity
	MF	GO:0008017	microtubule binding
	MF	GO:0015631	tubulin binding
	MF	GO:0008236	serine-type peptidase activity
	MF	GO:0017171	serine hydrolase activity
	MF	GO:0016705	oxidoreductase activity, acting on paired donors, with incorporation or reduction of molecular oxygen
	MF	GO:0003777	microtubule motor activity
	MF	GO:0070008	serine-type exopeptidase activity
	MF	GO:0005506	iron ion binding
	MF	GO:0008092	cytoskeletal protein binding
	MF	GO:0008238	exopeptidase activity
	MF	GO:0004185	serine-type carboxypeptidase activity
	MF	GO:0016717	oxidoreductase activity, acting on paired donors, with oxidation of a pair of donors resulting in the reduction of molecular oxygen to two molecules of water
	MF	GO:0004180	carboxypeptidase activity
	MF	GO:0003774	motor activity
	MF	GO:0016759	cellulose synthase activity
	MF	GO:0016760	cellulose synthase (UDP-forming) activity
	MF	GO:0045300	acyl-[acyl-carrier-protein] desaturase activity
	MF	GO:0046983	protein dimerization activity
	MF	GO:0046527	glucosyltransferase activity
	MF	GO:0051536	iron-sulfur cluster binding
	MF	GO:0051540	metal cluster binding
	MF	GO:0035251	UDP-glucosyltransferase activity
	MF	GO:0004252	serine-type endopeptidase activity
	MF	GO:0004857	enzyme inhibitor activity
	MF	GO:0016679	oxidoreductase activity, acting on diphenols and related substances as donors
BDM1 vs BDM3	BP	GO:0015979	photosynthesis
	BP	GO:0006022	aminoglycan metabolic process
	BP	GO:0006026	aminoglycan catabolic process
	BP	GO:0006030	chitin metabolic process
	BP	GO:0006032	chitin catabolic process
	BP	GO:0006040	amino sugar metabolic process
	BP	GO:0016998	cell wall macromolecule catabolic process
	BP	GO:0044036	cell wall macromolecule metabolic process
	BP	GO:0046348	amino sugar catabolic process
	BP	GO:1901071	glucosamine-containing compound metabolic process
	BP	GO:1901072	glucosamine-containing compound catabolic process
	BP	GO:1901136	carbohydrate derivative catabolic process
	BP	GO:0006260	DNA replication
	BP	GO:0006323	DNA packaging
	BP	GO:0000271	polysaccharide biosynthetic process
	BP	GO:0009250	glucan biosynthetic process
	BP	GO:0033692	cellular polysaccharide biosynthetic process
	BP	GO:0051273	beta-glucan metabolic process
	BP	GO:0051274	beta-glucan biosynthetic process
	BP	GO:0006334	nucleosome assembly
	BP	GO:0031497	chromatin assembly
	BP	GO:0034728	nucleosome organization
	BP	GO:0000003	reproduction
	BP	GO:0022414	reproductive process
	BP	GO:0044702	single organism reproductive process
	BP	GO:0051704	multi-organism process
	BP	GO:0065004	protein-DNA complex assembly
	BP	GO:0071824	protein-DNA complex subunit organization
	BP	GO:0006261	DNA-dependent DNA replication
	BP	GO:0030243	cellulose metabolic process
	BP	GO:0030244	cellulose biosynthetic process
	BP	GO:0006333	chromatin assembly or disassembly
	BP	GO:0006073	cellular glucan metabolic process
	BP	GO:0044042	glucan metabolic process
	BP	GO:0044264	cellular polysaccharide metabolic process
	BP	GO:0005976	polysaccharide metabolic process
	BP	GO:0008037	cell recognition
	BP	GO:0009856	pollination
	BP	GO:0009875	pollen-pistil interaction
	BP	GO:0044706	multi-multicellular organism process
	BP	GO:0048544	recognition of pollen
	BP	GO:0032501	multicellular organismal process
	CC	GO:0009579	thylakoid
	CC	GO:0044436	thylakoid part
	CC	GO:0034357	photosynthetic membrane
	CC	GO:0009521	photosystem
	CC	GO:0044427	chromosomal part
	CC	GO:0044815	DNA packaging complex
	CC	GO:0009523	photosystem II
	CC	GO:0005694	chromosome
	CC	GO:0032993	protein-DNA complex
	CC	GO:0000786	nucleosome
	CC	GO:0042651	thylakoid membrane
	CC	GO:0009654	photosystem II oxygen evolving complex
	CC	GO:0019898	extrinsic component of membrane
	CC	GO:0000785	chromatin
	CC	GO:1990204	oxidoreductase complex
	CC	GO:0098687	chromosomal region
	CC	GO:0009522	photosystem I
	MF	GO:0046982	protein heterodimerization activity
	MF	GO:0008236	serine-type peptidase activity
	MF	GO:0017171	serine hydrolase activity
	MF	GO:0004568	chitinase activity
	MF	GO:0070008	serine-type exopeptidase activity
	MF	GO:0008238	exopeptidase activity
	MF	GO:0004185	serine-type carboxypeptidase activity
	MF	GO:0008017	microtubule binding
	MF	GO:0015631	tubulin binding
	MF	GO:0004180	carboxypeptidase activity
	MF	GO:0035251	UDP-glucosyltransferase activity
	MF	GO:0046527	glucosyltransferase activity
	MF	GO:0016759	cellulose synthase activity
	MF	GO:0016760	cellulose synthase (UDP-forming) activity
	MF	GO:0008061	chitin binding
	MF	GO:0016705	oxidoreductase activity, acting on paired donors, with incorporation or reduction of molecular oxygen
	MF	GO:0016717	oxidoreductase activity, acting on paired donors, with oxidation of a pair of donors resulting in the reduction of molecular oxygen to two molecules of water
	MF	GO:0045300	acyl-[acyl-carrier-protein] desaturase activity
	MF	GO:0003777	microtubule motor activity

## Sheet: Table S6 C
Supplementary Table S6 C. Significant enriched GO terms of CYQ1 vs BDM1, CYQ2 vs BDM2, and CYQ3 vs BDM3 pairwise comparisons.
comparisons	Category	GO ID	Description
CYQ1 vs BDM1	BP	GO:0006790	sulfur compound metabolic process
	BP	GO:0006259	DNA metabolic process
	BP	GO:0015979	photosynthesis
	BP	GO:0006260	DNA replication
	BP	GO:1901565	organonitrogen compound catabolic process
	BP	GO:0006928	movement of cell or subcellular component
	BP	GO:0007018	microtubule-based movement
	BP	GO:0000096	sulfur amino acid metabolic process
	BP	GO:0044272	sulfur compound biosynthetic process
	BP	GO:0044282	small molecule catabolic process
	CC	GO:0034357	photosynthetic membrane
	CC	GO:0009521	photosystem
	CC	GO:0009579	thylakoid
	CC	GO:0044436	thylakoid part
	CC	GO:1990204	oxidoreductase complex
	CC	GO:0009523	photosystem II
	CC	GO:0042651	thylakoid membrane
	CC	GO:0009654	photosystem II oxygen evolving complex
	CC	GO:0019898	extrinsic component of membrane
	CC	GO:0009522	photosystem I
	MF	GO:0140096	catalytic activity, acting on a protein
	MF	GO:0008144	drug binding
	MF	GO:0005509	calcium ion binding
	MF	GO:0016829	lyase activity
	MF	GO:0004645	phosphorylase activity
	MF	GO:0008184	glycogen phosphorylase activity
	MF	GO:0003777	microtubule motor activity
	MF	GO:0004652	polynucleotide adenylyltransferase activity
	MF	GO:0070566	adenylyltransferase activity
	MF	GO:0016830	carbon-carbon lyase activity
CYQ2 vs BDM2	BP	GO:0015074	DNA integration
	BP	GO:0033013	tetrapyrrole metabolic process
	BP	GO:1901565	organonitrogen compound catabolic process
	BP	GO:0006790	sulfur compound metabolic process
	BP	GO:0010035	response to inorganic substance
	BP	GO:0006778	porphyrin-containing compound metabolic process
	BP	GO:0006575	cellular modified amino acid metabolic process
	BP	GO:0006558	L-phenylalanine metabolic process
	BP	GO:1902221	erythrose 4-phosphate/phosphoenolpyruvate family amino acid metabolic process
	BP	GO:0044272	sulfur compound biosynthetic process
	CC	GO:0019867	outer membrane
	CC	GO:0005856	cytoskeleton
	CC	GO:0015629	actin cytoskeleton
	CC	GO:0048046	apoplast
	CC	GO:0044430	cytoskeletal part
	CC	GO:0005759	mitochondrial matrix
	CC	GO:0005576	extracellular region
	CC	GO:0016459	myosin complex
	CC	GO:0071944	cell periphery
	CC	GO:0042651	thylakoid membrane
	MF	GO:0140096	catalytic activity, acting on a protein
	MF	GO:0008144	drug binding
	MF	GO:0043531	ADP binding
	MF	GO:0004866	endopeptidase inhibitor activity
	MF	GO:0030414	peptidase inhibitor activity
	MF	GO:0061134	peptidase regulator activity
	MF	GO:0061135	endopeptidase regulator activity
	MF	GO:0004652	polynucleotide adenylyltransferase activity
	MF	GO:0004869	cysteine-type endopeptidase inhibitor activity
	MF	GO:0003700	transcription factor activity, sequence-specific DNA binding
CYQ3 vs BDM3	BP	GO:0015074	DNA integration
	BP	GO:0033013	tetrapyrrole metabolic process
	BP	GO:0033014	tetrapyrrole biosynthetic process
	BP	GO:0044272	sulfur compound biosynthetic process
	BP	GO:0006778	porphyrin-containing compound metabolic process
	BP	GO:0006099	tricarboxylic acid cycle
	BP	GO:0006101	citrate metabolic process
	BP	GO:0009070	serine family amino acid biosynthetic process
	BP	GO:0006520	cellular amino acid metabolic process
	BP	GO:0015977	carbon fixation
	CC	GO:0000145	exocyst
	CC	GO:0005938	cell cortex
	CC	GO:0044448	cell cortex part
	CC	GO:0099568	cytoplasmic region
	CC	GO:0071944	cell periphery
	CC	GO:0099023	tethering complex
	CC	GO:0005576	extracellular region
	CC	GO:0048046	apoplast
	CC	GO:0030118	clathrin coat
	CC	GO:0005794	Golgi apparatus
	MF	GO:0008144	drug binding
	MF	GO:0043531	ADP binding
	MF	GO:0140096	catalytic activity, acting on a protein
	MF	GO:0016616	oxidoreductase activity, acting on the CH-OH group of donors, NAD or NADP as acceptor
	MF	GO:0140110	transcription regulator activity
	MF	GO:0003918	DNA topoisomerase type II (ATP-hydrolyzing) activity
	MF	GO:0061505	DNA topoisomerase II activity
	MF	GO:0004611	phosphoenolpyruvate carboxykinase activity
	MF	GO:0004470	malic enzyme activity
	MF	GO:0004471	malate dehydrogenase (decarboxylating) (NAD+) activity
